# Supplementary material
Source: HighWire-hosted journal article supplement (https://www.annfammed.org/highwire/filestream/15989/field_highwire_adjunct_files/0/ClaessensSuppApps.pdf)
Supplement: ClaessensSuppApps.pdf [file ClaessensSuppApps.pdf]

- A16** How many **puffs/inhalations** have you used  None  
**in addition** to your regular asthma  1-2 puffs/inhalations  
 medication in the past week?  3-6 puffs/inhalations  
 7 or more puffs/inhalations

***Additional questions for type 2 Diabetes Mellitus***

| In the past <u>month</u> , how often ...                                                                                                                                       | 0<br>Never               | 1<br>Hardly<br>ever      | 2<br>A few<br>times      | 3<br>Several<br>times    | 4<br>Many<br>times       | 5<br>A great<br>many<br>times | 6<br>Almost<br>all the<br>time |
|--------------------------------------------------------------------------------------------------------------------------------------------------------------------------------|--------------------------|--------------------------|--------------------------|--------------------------|--------------------------|-------------------------------|--------------------------------|
| <b>D11</b> did you suffer from complaints that could be associated with a low blood sugar level ( <b>hypo</b> ) (e.g. dizziness, shaking, blurred vision, excessive sweating)? | <input type="checkbox"/>      | <input type="checkbox"/>       |
| <b>D12</b> did you worry about your <b>blood sugar levels</b> ?                                                                                                                | <input type="checkbox"/>      | <input type="checkbox"/>       |
| <b>D13</b> did you suffer from tingling or a numb feeling or a burning feeling or pain in <b>the lower legs or feet</b> ?                                                      | <input type="checkbox"/>      | <input type="checkbox"/>       |
| <b>D14</b> did you experience difficulty managing your <b>eating and drinking</b> because of your diabetes?                                                                    | <input type="checkbox"/>      | <input type="checkbox"/>       |

***Lifestyle-related questions***

**The following questions relate to your lifestyle**

- In the past week, how many days have you had moderately intense **physical exercise** for 30 minutes or more?  0 days  
 1-2 days  
 3-4 days  
 5 days or more

E.g. walking or cycling in a fast pace  
 It may also be a minimum of 3x10 minutes

How many glasses of **alcohol** did you drink in the past week? ... glasses per week

- Do you **smoke** or have you smoked?  Yes. In the last week, how many (shag)cigarettes have you smoked on average per day? \_\_\_\_\_  
 Previously. Stopped smoking since: \_\_\_\_ (month) / \_\_\_\_ (year)  
 Never

What is your weight? ..... kg  
 What is your height? ..... cm

Is there anything else you would like to **discuss** or would like to receive **more information** about?

---

---

---

## Supplemental Appendix 2: Dutch version of the ABCC-scale

**Supplemental Appendix 2:** the Dutch version of the Assessment of Burden of Chronic Conditions (ABCC-) scale. The scale is built with the set of generic questions (translated: “algemene vragen”), a set of lifestyle questions (translated: “leefstijl-gerelateerde vragen”) and one or more sets of disease-specific questions (translated: “aanvullende vragen voor COPD/astma/type 2 diabetes mellitus”). These sets of questions are combined for the participant, who only sees one questionnaire that is adapted to his/her condition. The scale is developed and tested in Dutch language only. The ABCC-scale should always be used together with the visualization and treatment advice as present in the ABCC-tool.

### Algemene vragenlijst

Beste meneer/mevrouw,

Met deze vragenlijst willen we samen met u in kaart brengen hoe het met u gaat. Tijdens uw afspraak kunt u met uw zorgverlener praten over de onderwerpen die voor u belangrijk zijn.

**Deze vragen hebben te maken met de chronische aandoening(en) waarvoor u bij de zorgverlener komt.**

| <i>In de afgelopen <u>week</u>, hoe vaak ...</i> |                                                                                                     | 0                        | 1                        | 2                        | 3                        | 4                        | 5                        | 6                        |
|--------------------------------------------------|-----------------------------------------------------------------------------------------------------|--------------------------|--------------------------|--------------------------|--------------------------|--------------------------|--------------------------|--------------------------|
|                                                  |                                                                                                     | Nooit                    | Zelden                   | Af en toe                | Regelmatig               | Heel vaak                | Meestal                  | Altijd                   |
| G1                                               | had u last van <b>vermoeidheid</b> ?                                                                | <input type="checkbox"/> |
| G2                                               | had u een <b>slechte nachtrust</b> ?                                                                | <input type="checkbox"/> |
| G3                                               | had u last van somberheid, angst, frustratie, schaamte of andere <b>vervelende gevoelens</b> ?      | <input type="checkbox"/> |
| G4                                               | ervaarde u het nemen van <b>medicijnen</b> (bijv. tabletten, pufjes, insulinespuiten) als een last? | <input type="checkbox"/> |

  

| <i>In de afgelopen <u>week</u>, in welke mate ...</i> |                                                                                                                     | 0                        | 1                        | 2                        | 3                        | 4                        | 5                        | 6                        |
|-------------------------------------------------------|---------------------------------------------------------------------------------------------------------------------|--------------------------|--------------------------|--------------------------|--------------------------|--------------------------|--------------------------|--------------------------|
|                                                       |                                                                                                                     | Heel-aal niet            | Heel weinig              | Een beetje               | Tame-lijk                | Erg                      | Heel erg                 | Volle-dig                |
| G5                                                    | voelde u zich beperkt in <b>zware lichamelijke activiteiten</b> (trap lopen, haasten, sporten)?                     | <input type="checkbox"/> |
| G6                                                    | voelde u zich beperkt in <b>matige lichamelijke activiteiten</b> (wandelen, huishoudelijk werk, boodschappen doen)? | <input type="checkbox"/> |
| G7                                                    | voelde u zich beperkt in <b>dagelijkse activiteiten</b> (u zelf aankleden, wassen)?                                 | <input type="checkbox"/> |
| G8                                                    | voelde u zich beperkt in uw <b>werk en/of sociale activiteiten</b> (uitjes, vrienden en familie bezoeken)?          | <input type="checkbox"/> |
| G9                                                    | maakte u zich <b>zorgen over uw toekomst</b> ?                                                                      | <input type="checkbox"/> |
| G10                                                   | had u moeite met <b>intimiteit en seksualiteit</b> ?                                                                | <input type="checkbox"/> |

*Zie volgende pagina voor de aanvullende vragen per aandoening*

### Aanvullende vragen voor COPD

| <i>In de afgelopen <u>week</u>, hoe vaak ...</i> |                                                                                                                            | 0<br>Nooit                                                                                                                                                                                                                                                                                                                          | 1<br>Zelden              | 2<br>Af en<br>toe        | 3<br>Regel-<br>matig     | 4<br>Heel<br>vaak        | 5<br>Meest<br>al         | 6<br>Altijd              |
|--------------------------------------------------|----------------------------------------------------------------------------------------------------------------------------|-------------------------------------------------------------------------------------------------------------------------------------------------------------------------------------------------------------------------------------------------------------------------------------------------------------------------------------|--------------------------|--------------------------|--------------------------|--------------------------|--------------------------|--------------------------|
| C11                                              | voelde u zich kortademig <b>in rust</b> ?                                                                                  | <input type="checkbox"/>                                                                                                                                                                                                                                                                                                            | <input type="checkbox"/> | <input type="checkbox"/> | <input type="checkbox"/> | <input type="checkbox"/> | <input type="checkbox"/> | <input type="checkbox"/> |
| C12                                              | voelde u zich kortademig <b>gedurende lichamelijke inspanning</b> ?                                                        | <input type="checkbox"/>                                                                                                                                                                                                                                                                                                            | <input type="checkbox"/> | <input type="checkbox"/> | <input type="checkbox"/> | <input type="checkbox"/> | <input type="checkbox"/> | <input type="checkbox"/> |
| C13                                              | voelde u zich <b>angstig/bezorgd</b> voor de volgende benauwdheidsaanval?                                                  | <input type="checkbox"/>                                                                                                                                                                                                                                                                                                            | <input type="checkbox"/> | <input type="checkbox"/> | <input type="checkbox"/> | <input type="checkbox"/> | <input type="checkbox"/> | <input type="checkbox"/> |
| C14                                              | heeft u <b>gehoest</b> ?                                                                                                   | <input type="checkbox"/>                                                                                                                                                                                                                                                                                                            | <input type="checkbox"/> | <input type="checkbox"/> | <input type="checkbox"/> | <input type="checkbox"/> | <input type="checkbox"/> | <input type="checkbox"/> |
| C15                                              | heeft u <b>slijm</b> opgehoest?                                                                                            | <input type="checkbox"/>                                                                                                                                                                                                                                                                                                            | <input type="checkbox"/> | <input type="checkbox"/> | <input type="checkbox"/> | <input type="checkbox"/> | <input type="checkbox"/> | <input type="checkbox"/> |
| C16                                              | In de afgelopen <b>12 maanden</b> , hoeveel <b>prednison- en/of antibioticakuren</b> heeft u voor uw longaandoening gehad? | <input type="checkbox"/> 0 prednison- en/of antibioticakuren<br><input type="checkbox"/> 1 prednison- en/of antibioticakuur<br><input type="checkbox"/> 2 prednison- en/of antibioticakuren<br><input type="checkbox"/> 3 prednison- en/of antibioticakuren<br><input type="checkbox"/> 4 of meer prednison- en/of antibioticakuren |                          |                          |                          |                          |                          |                          |

### Aanvullende vragen voor astma

| <i>In de afgelopen <u>week</u>, in welke mate ...</i> |                                                     | 0<br>Helem-<br>-aal<br>niet | 1<br>Heel<br>weinig      | 2<br>Een<br>beetje       | 3<br>Tame-<br>lijk       | 4<br>Erg                 | 5<br>Heel<br>erg         | 6<br>Volle-<br>-dig      |
|-------------------------------------------------------|-----------------------------------------------------|-----------------------------|--------------------------|--------------------------|--------------------------|--------------------------|--------------------------|--------------------------|
| A11                                                   | had u last van astmaklachten in de <b>ochtend</b> ? | <input type="checkbox"/>    | <input type="checkbox"/> | <input type="checkbox"/> | <input type="checkbox"/> | <input type="checkbox"/> | <input type="checkbox"/> | <input type="checkbox"/> |

| <i>In de afgelopen <u>week</u>, hoe vaak ...</i> |                                                                                       | 0<br>Nooit               | 1<br>Zelden              | 2<br>Af en<br>toe        | 3<br>Regel-<br>matig     | 4<br>Heel<br>vaak        | 5<br>Meest<br>al         | 6<br>Altijd              |
|--------------------------------------------------|---------------------------------------------------------------------------------------|--------------------------|--------------------------|--------------------------|--------------------------|--------------------------|--------------------------|--------------------------|
| A12                                              | werd u 's nachts <b>wakker</b> door uw astmaklachten?                                 | <input type="checkbox"/> |
| A13                                              | had u last van <b>kortademigheid</b> door uw astma?                                   | <input type="checkbox"/> |
| A14                                              | voelde u zich <b>angstig/bezorgd</b> voor de volgende benauwdheidsaanval?             | <input type="checkbox"/> |
| A15                                              | had u last van een <b>verstopte neus, jeuk aan de neus, niezen, of een loopneus</b> ? | <input type="checkbox"/> |

- A16 Hoeveel **pufjes/inhalaties** heeft u in de afgelopen week **extra** gebruikt naast uw normale astmamedicatie?
- Geen
  - 1-2 pufjes/inhalaties
  - 3-6 pufjes/inhalaties
  - 7 of meer pufjes/inhalaties

## Aanvullende vragen voor type 2 diabetes mellitus

|     |                                                                                                                                                                   | 0                        | 1                        | 2                        | 3                        | 4                        | 5                        | 6                        |
|-----|-------------------------------------------------------------------------------------------------------------------------------------------------------------------|--------------------------|--------------------------|--------------------------|--------------------------|--------------------------|--------------------------|--------------------------|
|     | In de afgelopen <u>maand</u> , hoe vaak ...                                                                                                                       | Nooit                    | Zelden                   | Af en toe                | Regelmatig               | Heel vaak                | Meestal                  | Altijd                   |
| D11 | had u last van klachten die kunnen passen bij een te lage bloedsuikerwaarde ( <b>hypo</b> ) (bijv. duizeligheid, trillen, plots slechter zien, overmatig zweten)? | <input type="checkbox"/> |
| D12 | maakte u zich <b>ongerust</b> over uw <b>bloedsuikerwaarden</b> ?                                                                                                 | <input type="checkbox"/> |
| D13 | had u last van tintelingen of een doof gevoel of brandend gevoel of pijn in de <b>onderbenen of voeten</b> ?                                                      | <input type="checkbox"/> |
| D14 | vond u het lastig om op uw <b>eten en drinken</b> te letten vanwege uw diabetes?                                                                                  | <input type="checkbox"/> |

## Leefstijl-gerelateerde vragen

### De volgende vragen gaan over uw leefstijl

- In de afgelopen week, hoeveel dagen heeft u 30 minuten of meer matig intensieve **lichaamsbeweging** gehad?
- 0 dagen  
 1-2 dagen  
 3-4 dagen  
 5 dagen of meer

Bijv. stevig doorwandelen of harder fietsen.  
 Het mogen ook minimaal 3x10 minuten zijn.

Hoeveel glazen **alcohol** dronk u in de afgelopen week? ... glazen per week

- Rookt** u of heeft u gerookt?
- Ja. Hoeveel (shag)sigaretten heeft u in de afgelopen week gemiddeld per dag gerookt? \_\_\_\_\_  
 Vroeger. Gestopt met roken sinds: \_\_\_(maand) / \_\_\_(jaar)  
 Nooit

Wat is uw **gewicht**? ..... kg

Wat is uw **lengte**? ..... cm

Is er nog iets wat u wilt **bespreken** of waar u **meer informatie** over wilt krijgen?

---



---

## **Supplemental Appendix 3: Additional information with regard to the methods**

### Study design justification

The ABCC-tool is developed to meet clinical experts' needs of a brief and concise tool to use in clinical practice. The tool's goal is to highlight the various aspects that infer burden of disease, and is not designed to deliver detailed information about each symptom or aspect of burden of disease. The healthcare provider and patient choose one or several aspects to discuss, and subsequently elaborate on that or those aspect(s) during the conversation. As such, the questionnaire consists of a minimum number of items, resulting in several single-item domains (i.e. constructs of burden of disease, such as fatigue). All items are considered clinically relevant by participating experts in the expert panel, making it undesirable to use statistical methods to drop or restructure items<sup>5</sup>.

### Sample size justification

Based on the sample size we calculated the effect sizes that could be detected with 80% power and a two-sided significance level  $\alpha$  of 0.05 in order to reflect on the adequacy of the sample size. PASS (2019; v19.0.9) was used for all calculations.

As for construct validity, concerning Pearson's correlations between the ABCC-scale and commonly-used QoL measures, a correlation as small as 0.345 would already yield the required power to detect a significant association. With regard to the differentiation of known groups the outcome parameter was a standardized difference in means between two groups based on a single characteristic. For the purpose of sample size calculations the validation study of the ABCC-scale predecessor was most comparable to our study design<sup>36</sup>. As this scale was developed for people with COPD only, our sample size calculation was based on the differentiation of patient groups



based on their exacerbation count over a year, with regard to COPD symptoms (named pulmonary complaints in the current ABCC-tool). Assuming the same group sizes ( $n_1 = n_2$ ), a standardized effect size (Cohen's  $d$ ) of 0.74 can be detected with sufficient power based on the independent-samples  $t$ -test. This is in line with the standardized effect size of 0.72 obtained from the predecessor's validation study<sup>36</sup>, when the presented median and interquartile range were transformed into a mean and standard deviation according to the methods of Wan et. al (2014)<sup>45</sup>. The internal consistency was evaluated using the Cronbach's alpha for the total score and its multi-item domains. As smaller number of items lead to higher required sample sizes,  $k$  is set to 3. A Cronbach's alpha of 0.466 or larger can be detected under the aforementioned assumptions. The test-retest reliability was estimated by the intra-class coefficient (ICC), where ICCs of 0.31 or larger yield at least 80% power.

### Questionnaires used in the validation study

#### *ABCC-scale*

The ABCC-scale is a multicomponent questionnaire in the Dutch language<sup>5</sup>. A non-linguistic translation of the questionnaire is presented in Supplemental Appendix 1, while the Dutch version is presented in Supplemental Appendix 2. It consists of a generic core set of questions that might be relevant to anyone with the aforementioned chronic conditions (i.e. either COPD, asthma or T2DM), and additional disease-specific questions that are added for these conditions (Supplemental Appendix file 1). The generic part consists of ten items that are represented in seven domains: physical limitations (3 items), fatigue (1 item), night's rest (1 item), feelings/emotions (2 items), sexuality (1 item), relations and work (1 item), and medicines (1 item). For someone with COPD, six additional items are represented in two additional domains (pulmonary complaints

(4 item) and lung attacks (exacerbations; 1 item)) and in one existing domain (feelings/emotions (1 item)). For someone with asthma, seven additional items are added into three additional domains (asthma complaints (4 items), lung attacks (exacerbations; 1 item), and nasal complaints (1 item)) and one existing domain (feelings/emotions (1 item)). For someone with T2DM, four additional items are added into four additional domains: hypoglycemia (described as hypo; 1 item), worry about blood glucose (1 item), leg- and feet complaints (1 item), and eating and drinking (1 item). The domain lung attacks for people with COPD or asthma regards the frequency of exacerbations in a year, which is not a subjective evaluation of burden. It will therefore not be included in the assessment of validity and reliability. The same applies to the lifestyle questions. At the end of the questionnaire, an open-ended question presents the opportunity to add anything that gives rise to their experience of burden of disease. Due to the open-ended nature of this last question, it will not be taken into account in the analyses. All burden-related items are scored on a 7-point Likert scale from 0 (no burden) to 6 (highest burden). Multi-item domains are scored as the sum of responses divided by the amount of items. The total score is calculated by the sum of domain scores, divided by the number of domains, in which it is assumed that all domains are equally relevant to the total score. One missing value was tolerated for multi-item domains, with exceptions for items C13 and A14 because these items add unique information to the domain based on expert opinion (Supplemental Appendix file 1). A missing item was imputed by the participant's mean score of the other items in that domain except for single-item domains. In that case, that particular domain was excluded from the total score calculation. All ABCC-scales are presented in Supplemental Appendix file 1.

*SGRQ*

The Dutch version of the SGRQ was used, which is a disease-specific 50-item QoL questionnaire for people with COPD<sup>10</sup>. The SGRQ consists of three subscales: symptoms (8 items), activity (16 items), and impact (26 items). Thirty-nine questions are dichotomous (i.e. yes/no) and 11 items are scored on a 5-point Likert scale. Total and subscale score calculation and handling of missing data were performed according to the scoring manual<sup>46</sup>. The total and subscale scores range from 0 (no impairment) to 100 (worst impairment).

### *HADS*

The Dutch version of the HADS is a 14-item screening scale for anxiety and depression<sup>13,47,48</sup>. It contains two subscales: anxiety (7 items) and depression (7 items). All items range from 0 (no sign of anxiety/depression) to 3 (clear sign of anxiety/depression). For this study, only the depression subscale was used, which is scored by the sum of the depression items of the scale. One missing value was tolerated, and imputed by the participant's mean of the remaining items. A depression subscale score of eight or higher discriminated between (borderline) depression and no depression<sup>48</sup>.

### *AQLQ-S*

The Dutch version of the AQLQ-S is a 32-item disease-specific QoL scale for people with asthma<sup>11</sup>. It contains four subscales: symptoms (12 items), activity limitations (11 items), emotional function (5 items), and environmental stimuli (4 items). All items are scored on a 7-point Likert scale, ranging from 1 (i.e. severe impairment) to 7 (i.e. no impairment). The subscale scores were calculated as the sum of the items divided by the number of items. The total score was calculated as the sum of all items divided by the total number of items. A maximum of three

missing values was tolerated for the total score, and only one missing value was tolerated for the symptoms and activity limitation subscales. Missing values were imputed with the participant's mean of the other items. These calculations are based on the scoring manual that is available upon request from the original author of the AQLQ-S.

### *ADDQoL19*

The ADDQoL19 is a 19-item questionnaire measuring disease-specific QoL for people with T2DM<sup>12</sup>. Each of the 19 items is scored based on how a person's QoL would be without T2DM and its importance to that person. The impact of each item is scored from -3 (QoL is much better without T2DM) to +1 (QoL is worse without T2DM), and the importance is scored from 0 (not important at all) to 3 (very important). Both scores are multiplied to create the weighted impact (WI) of that item. The total score is the Average Weighted Impact (AWI), and is calculated by averaging the sum of WIs over the number of items included. Missing values are not tolerated in calculation of the item WIs, and up to six missing items are tolerated for calculation of the AWI. These calculations are based on the scoring manual that is available upon request from the original author of the ADDQoL19.

### **References**

1. Wan X, Wang W, Liu J, Tong T. Estimating the sample mean and standard deviation from the sample size, median, range and/or interquartile range. *BMC Med Res Methodol*. 2014;14:135. 10.1186/1471-2288-14-135.

2. Jones PW, Forde Y. St. George's Respiratory Questionnaire Manual. Version 2.3 London: St. George's University of London; 2009.

3. Spinhoven P, Ormel J, Sloekers PP, Kempen GI, Speckens AE, Van Hemert AM. A validation study of the Hospital Anxiety and Depression Scale (HADS) in different groups of Dutch subjects. *Psychol Med.* 1997;27(2):363-370. 10.1017/s0033291796004382.

4. Bjelland I, Dahl AA, Haug TT, Neckelmann D. The validity of the Hospital Anxiety and Depression Scale. An updated literature review. *J Psychosom Res.* 2002;52(2):69-77. 10.1016/s0022-3999(01)00296-3.

#### Supplemental Appendix 4: Baseline characteristics – additional characteristics

| Condition                                             | COPD      | Asthma    | T2DM      |
|-------------------------------------------------------|-----------|-----------|-----------|
| <b>Total included, n</b>                              | <b>65</b> | <b>62</b> | <b>60</b> |
| Marital status, n (%)                                 |           |           |           |
| - Single                                              | 4 (6.2)   | 17 (27.4) | 10 (16.7) |
| - Married                                             | 54 (83.1) | 37 (59.7) | 38 (63.3) |
| - Divorced                                            | 5 (7.7)   | 7 (11.3)  | 7 (11.7)  |
| - Widowed                                             | 2 (3.1)   | 1 (1.6)   | 5 (8.3)   |
| Paid job                                              |           |           |           |
| - Yes                                                 | 5 (7.7)   | 20 (32.3) | 11 (18.3) |
| - No                                                  | 60 (92.3) | 42 (67.7) | 49 (81.7) |
| Retired                                               |           |           |           |
| - Yes                                                 | 36 (55.4) | 14 (22.6) | 34 (56.7) |
| - No                                                  | 22 (33.8) | 27 (43.5) | 15 (25.0) |
| - Not applicable                                      | 4 (6.2)   | 19 (30.6) | 10 (16.7) |
| Treated by, n (%)                                     |           |           |           |
| - General practitioner                                | 11 (16.9) | 17 (27.4) | 48 (80.0) |
| - Medical specialist                                  | 52 (80.0) | 37 (59.7) | 10 (16.7) |
| Emergency visit exacerbation, previous year, n (%)    |           |           |           |
| - 0                                                   | 43 (66.2) | 55 (88.7) | -         |
| - 1                                                   | 13 (20.0) | 5 (8.1)   | -         |
| - 2                                                   | 6 (9.2)   | 1 (1.6)   | -         |
| - >2                                                  | 3 (4.6)   | 1 (1.6)   | -         |
| Hospital admission exacerbation, previous year, n (%) |           |           |           |
| - 0                                                   | 48 (73.8) | 57 (91.9) | -         |
| - 1                                                   | 13 (20.0) | 3 (4.8)   | -         |
| - 2                                                   | 2 (3.1)   | 1 (1.6)   | -         |
| - >2                                                  | 2 (3.1)   | 1 (1.6)   | -         |
| Asthma control (based on GINA <sup>a</sup> (28))      |           |           |           |
| - Controlled                                          | N/a       | 12 (19.4) | N/a       |
| - Partially controlled                                | N/a       | 6 (9.7)   | N/a       |
| - Not controlled                                      | N/a       | 43 (69.4) | N/a       |
| Body Mass Index, kg/m <sup>2</sup> , n (%)            |           |           |           |
| - Underweight (<18.5)                                 | -         | -         | 2 (3.3)   |
| - Normal weight (18.5-24.9)                           | -         | -         | 29 (48.3) |
| - Overweight (25.0-29.9)                              | -         | -         | 13 (21.7) |
| - Obesity (30.0-39.9)                                 | -         | -         | 14 (23.3) |
| - Morbid obesity (≥40)                                | -         | -         | 2 (3.3)   |
| Complications, n (%)                                  |           |           |           |
| - Nephropathy                                         | -         | -         | 7 (11.7)  |
| - Neuropathy                                          | -         | -         | 18 (30)   |
| - Retinopathy                                         | -         | -         | 17 (28.3) |
| - Sexual problems                                     | -         | -         | 23 (38.3) |
| - Amputation                                          | -         | -         | 0 (0)     |
| - Diabetic foot / foot ulcers                         | -         | -         | 5 (8.3)   |
| - Cardiovascular disease                              | -         | -         | 29 (48.3) |

<sup>a</sup>Global Initiative for Asthma global strategy for asthma management and prevention, 2021 update (28)

### Supplemental Appendix 5. Questionnaire outcomes for each condition

| Questionnaire                                              | T0               | T1            |
|------------------------------------------------------------|------------------|---------------|
| <b>COPD</b>                                                | <b>n=65</b>      | <b>n=60</b>   |
| T1-T0, days, median (IQR)                                  | 17 (15.0-20.0)   |               |
| ABCC scale <sup>a</sup> , median (IQR), range 0-6          |                  |               |
| - Total                                                    | 2.4 (1.5-3.0)    | 2.4 (1.4-2.9) |
| - Fatigue                                                  | 3.0 (2.0-4.5)    | 3.0 (2.0-4.0) |
| - Night's rest                                             | 2.0 (1.0-3.0)    | 2.0 (1.0-3.0) |
| - Feelings/emotions                                        | 1.3 (0.7-2.3)    | 1.3 (0.7-2.3) |
| - Medicines                                                | 0.0 (0.0-1.0)    | 0.0 (0.0-1.0) |
| - Physical limitations                                     | 3.0 (2.0-4.3)    | 3.3 (2.3-4.3) |
| - Relations and work                                       | 2.0 (1.0-4.0)    | 2.0 (1.0-3.0) |
| - Sexuality                                                | 2.0 (0.0-4.0)    | 2.0 (1.0-4.0) |
| - Pulmonary complaints                                     | 2.8 (2.0-3.5)    | 2.8 (2.0-3.8) |
| SGRQ <sup>b</sup> , median (IQR), range 0-100              |                  |               |
| - Total                                                    | 53.3 (38.0-64.0) |               |
| - Symptoms                                                 | 62.2 (38.1-73.3) |               |
| - Activity                                                 | 21.0 (14.2-40.5) |               |
| - Impact                                                   | 40.2 (25.4-48.0) |               |
| HADS <sup>c</sup> , median (IQR), range 0-21               |                  |               |
| - Total                                                    | 7.0 (3.5-13.5)   |               |
| - Depression subscale                                      | 3.0 (1.0-7.0)    |               |
| - Anxiety subscale                                         | 4.0 (2.0-7.0)    |               |
| <b>Asthma</b>                                              | <b>n=62</b>      | <b>n=50</b>   |
| T1-T0, days, median (IQR)                                  | 17 (16-19)       |               |
| ABCC scale, median (IQR), range 0-6                        |                  |               |
| - Total                                                    | 2.3 (1.5-2.9)    | 2.2 (1.5-2.8) |
| - Fatigue                                                  | 3.0 (0.0-6.0)    | 3.0 (2.0-4.0) |
| - Night's rest                                             | 3.0 (1.0-5.0)    | 2.0 (2.0-3.0) |
| - Feelings/emotions                                        | 1.3 (0.0-3.0)    | 1.3 (0.6-1.7) |
| - Medicines                                                | 1.0 (0.0-2.0)    | 1.0 (0.0-1.0) |
| - Physical limitations                                     | 2.2 (1.3-3.0)    | 2.0 (1.0-2.7) |
| - Relations and work                                       | 2.0 (0.0-4.0)    | 2.0 (1.0-3.0) |
| - Sexuality                                                | 2.0 (0.0-5.0)    | 1.0 (0.0-3.0) |
| - Asthma complaints                                        | 2.5 (1.2-3.3)    | 2.5 (1.5-3.4) |
| - Nasal complaints                                         | 3.0 (0.0-6.0)    | 3.0 (2.0-4.0) |
| AQLQ-Standardized <sup>d</sup> , median (IQR) ¶, range 0-7 |                  |               |
| - Total                                                    | 5.2 (4.2-5.9)    |               |
| - Symptoms                                                 | 5.0 (4.1-5.9)    |               |
| - Activity limitation                                      | 4.9 (3.9-5.8)    |               |
| - Emotional function                                       | 6.0 (5.2-6.4)    |               |
| - Environmental exposure                                   | 5.0 (3.9-5.8)    |               |
| <b>T2DM</b>                                                | <b>n=60</b>      | <b>n=53</b>   |
| T1-T0, days, median (IQR)                                  | 18 (15.5-21.5)   |               |
| ABCC scale, median (IQR), range 0-6                        |                  |               |
| - Total                                                    | 1.4 (0.9-2.2)    | 1.3 (0.9-2.2) |
| - Fatigue                                                  | 3.0 (1.0-3.8)    | 2.0 (2.0-3.0) |
| - Night's rest                                             | 2.0 (1.0-3.0)    | 2.0 (1.0-3.0) |
| - Feelings/emotions                                        | 1.0 (0.5-2.0)    | 1.0 (0.5-1.5) |
| - Medicines                                                | 1.0 (0.0-2.0)    | 1.0 (0.0-2.0) |
| - Physical limitations                                     | 1.7 (0.7-3.0)    | 1.3 (0.7-2.7) |
| - Relations and work                                       | 1.0 (0.0-2.0)    | 1.0 (0.0-2.0) |
| - Sexuality                                                | 1.0 (0.0-3.0)    | 1.0 (0.0-3.0) |
| - Hypoglycaemia                                            | 1.0 (0.0-2.0)    | 1.0 (0.0-2.0) |

|                                                   |                    |               |
|---------------------------------------------------|--------------------|---------------|
| - Worry about blood glucose                       | 1.0 (1.0-2.0)      | 1.0 (1.0-2.0) |
| - Leg- and feet complaints                        | 1.0 (0.0-3.8)      | 1.0 (0.0-3.0) |
| - Eating and drinking                             | 2.0 (1.0-3.0)      | 1.0 (1.0-2.0) |
| ADDQoL <sup>e</sup> , median (IQR), range -9 – +3 |                    |               |
| - Average Weighted Impact (AWI)                   | -0.8 (-1.8 – -0.3) |               |
| - Leisure                                         | 0.0 (-2.0 – 0.0)   |               |
| - Work                                            | 0.0 (-2.0 – 0.0)   |               |
| - Journeys                                        | 0.0 (-2.0 – 0.0)   |               |
| - Holidays                                        | 0.0 (-2.0 – 0.0)   |               |
| - Physical                                        | -1.0 (-2.8 – 0.0)  |               |
| - Family life                                     | 0.0 (-2.0 – 0.0)   |               |
| - Friendships and social life                     | 0.0 (-2.0 – 0.0)   |               |
| - Personal relationship                           | 0.0 (-2.0 – 0.0)   |               |
| - Sex life                                        | -1.0 (-3.0 – 0.0)  |               |
| - Physical appearance                             | 0.0 (0.0 – 0.0)    |               |
| - Self-confidence                                 | 0.0 (0.0 – 0.0)    |               |
| - Motivation                                      | 0.0 (-2.0 – 0.0)   |               |
| - Reactions of other people                       | 0.0 (0.0 – 0.0)    |               |
| - Feelings about the future                       | -0.5 (-2.8 – 0.0)  |               |
| - Financial situation                             | 0.0 (0.0 – 0.0)    |               |
| - Living conditions                               | 0.0 (-2.0 – 0.0)   |               |
| - Depend on others                                | 0.0 (0.0 – 0.0)    |               |
| - Freedom to eat                                  | -2.0 (-4.0 – 0.0)  |               |
| - Freedom to drink                                | -1.0 (-2.0 – 0.0)  |               |

<sup>a</sup>Assessment of Burden of Chronic Conditions tool, high scores equal high burden, <sup>b</sup>Saint George Respiratory Questionnaire, high scores equal low QoL, <sup>c</sup>Hospital Anxiety and Depression Scale, high scores equal possible (8-10) or probable (11-21) depression/anxiety, <sup>d</sup>Asthma Quality of Life Questionnaire, high scores equal high QoL, <sup>e</sup>Audit of Diabetes-Dependent Quality of Life, high scores equal high QoL
